# Supplementary material
Source: PubMed Central journal article supplement (PMC8380647)
Supplement: NIHMS1682666-supplement-1682666_SuppMaterials.pdf [file NIHMS1682666-supplement-1682666_SuppMaterials.pdf]

## Supplementary Material

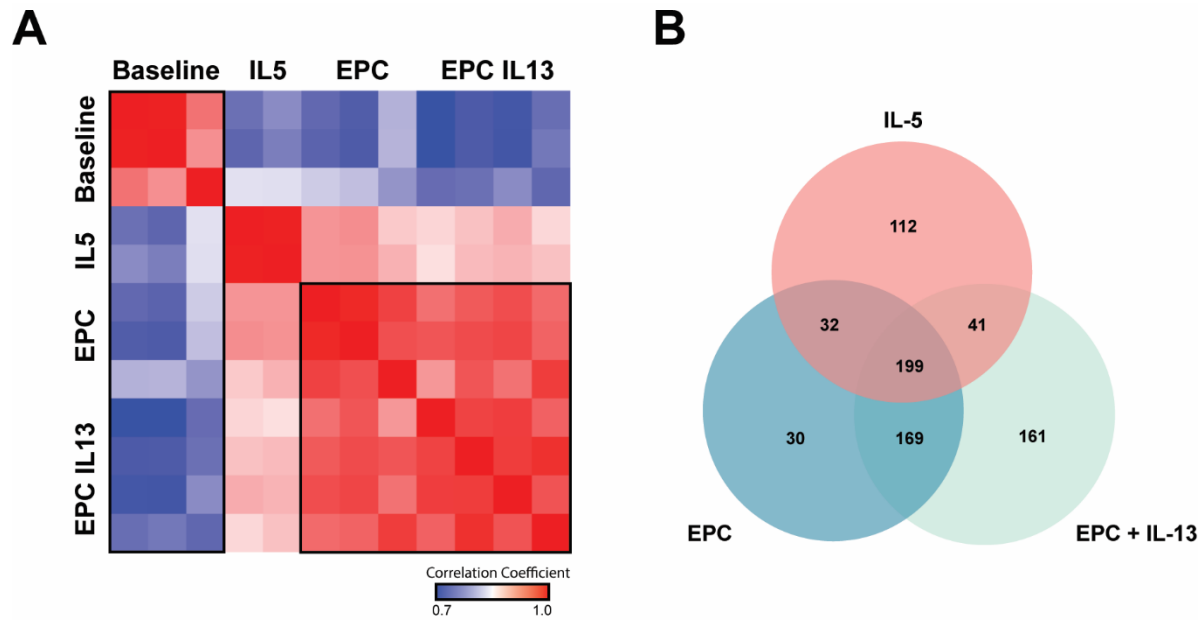

**Figure S1. Treatment-specific responses of eosinophil gene expression.** (A) Pearson's correlation coefficient was calculated between each eosinophil RNA sequencing sample. Coefficients range from 0.7 (blue) to 1.0 (red). (B) DEseq was used to identify significantly upregulated genes in cultured eosinophils with respect to baseline. Genes with a fold change > 2 and an adjusted p value < 0.05 in each condition were compared between conditions.

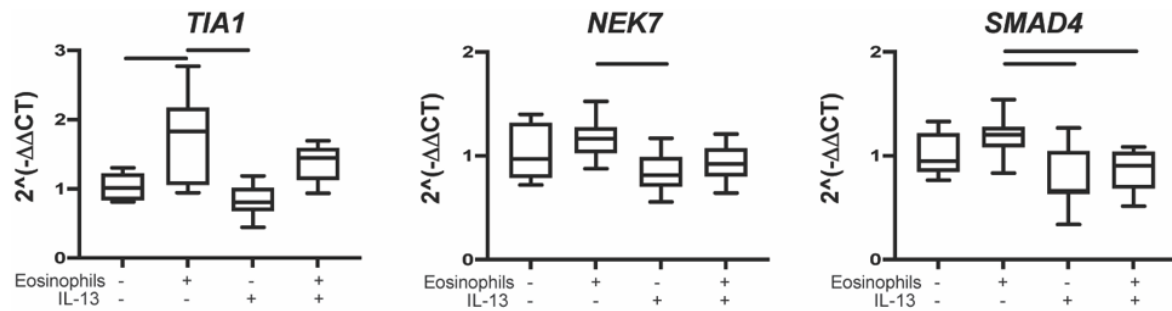

**Figure S2. Verified coculture-responsive gene expression in epithelial cells.** Expression of *TIA1*, *NEK7*, and *SMAD4* was quantified by rtPCR. Data represent 5-7 technical replicates compiled over 3 biological replicates. Significance was calculated with one-way ANOVA and bars represent post-test significance at  $p < 0.05$ .

Supplemental Table S1. Multiplex array of coculture supernatants

|                                 | Eosinophils + IL-5 |       |       | Eosinophils + EPC2 |        |        | Eos + EPC2 + IL-13 |         |        | EPC2   |        | EPC2 + IL-13 |        |
|---------------------------------|--------------------|-------|-------|--------------------|--------|--------|--------------------|---------|--------|--------|--------|--------------|--------|
| <b>EGF</b>                      | 315.3              | 295.0 | 297.0 | 6.9                | 7.5    | 5.7    | 5.3                | 5.0     | 7.2    | 5.7    | 5.0    | 6.1          | 5.5    |
| <b>FGF-2</b>                    | 121.2              | 111.2 | 124.1 | 46.0               | 53.6   | 51.2   | 37.0               | 59.3    | 51.2   | 54.2   | 52.4   | 57.7         | 48.7   |
| <b>Eotaxin-1</b>                | 3.6                | 4.7   | 2.2   | 2.6                | 3.3    | 6.6    | 3.1                | 4.5     | 3.1    | 2.4    | 1.7    | 3.3          | 4.7    |
| <b>TGF-<math>\alpha</math></b>  | 1.5                | 1.6   | 1.4   | 34.6               | 38.6   | 32.3   | 34.6               | 40.1    | 35.1   | 30.4   | 44.4   | 34.7         | 35.0   |
| <b>G-CSF</b>                    | ND                 | 1.2   | ND    | 2893.1             | 2554.0 | 2960.3 | OOO                | OOO     | 8681.3 | 4325.8 | 4610.5 | 8425.3       | 9073.5 |
| <b>Fit-3L</b>                   | 2.7                | 1.3   | 2.2   | 13.1               | 15.2   | 13.8   | 17.7               | 21.1    | 19.1   | 13.5   | 13.6   | 16.6         | 18.0   |
| <b>GM-CSF</b>                   | 1.0                | 2.2   | 1.2   | 89.5               | 84.0   | 128.0  | 260.7              | 249.5   | 196.4  | 181.6  | 177.1  | 179.1        | 188.3  |
| <b>Fractalkine</b>              | 10.1               | 50.6  | 16.0  | 47.7               | 33.8   | 37.8   | 36.8               | 40.8    | 39.8   | 43.7   | 35.8   | 38.8         | 29.9   |
| <b>IFN<math>\alpha</math>2</b>  | 3.2                | 9.4   | 3.2   | 72.2               | 80.1   | 67.9   | 110.6              | 120.4   | 101.1  | 77.6   | 71.1   | 113.4        | 120.4  |
| <b>IFN<math>\gamma</math></b>   | 2.0                | 0.1   | 1.2   | 1.8                | 1.1    | 2.3    | 10.1               | 9.7     | 9.0    | 2.2    | 2.0    | 10.8         | 8.5    |
| <b>GRO-<math>\alpha</math></b>  | 18.8               | 33.6  | 31.9  | OOO                | OOO    | OOO    | OOO                | OOO     | OOO    | OOO    | OOO    | OOO          | OOO    |
| <b>IL-10</b>                    | 0.0                | 0.1   | 0.2   | 4.0                | 3.6    | 3.1    | 16.4               | 15.5    | 11.1   | 3.0    | 3.7    | 8.8          | 7.2    |
| <b>MCP-3</b>                    | 7.6                | ND    | 8.4   | 5.6                | 8.4    | 9.7    | 0.2                | 10.0    | 9.7    | ND     | 6.9    | 13.4         | 10.9   |
| <b>IL-12P40</b>                 | 2.4                | 2.1   | 4.8   | 50.9               | 47.6   | 43.3   | 72.6               | 69.1    | 62.9   | 48.3   | 49.0   | 67.1         | 65.4   |
| <b>MDC</b>                      | 133.2              | OOO   | 43.2  | 29.8               | 120.0  | 120.0  | 85.5               | 265.0   | 110.7  | 133.2  | 101.0  | 128.8        | 90.8   |
| <b>PDGF-AA</b>                  | 0.2                | 0.1   | 0.1   | OOO                | OOO    | OOO    | OOO                | OOO     | OOO    | OOO    | OOO    | OOO          | OOO    |
| <b>IL-13</b>                    | 0.2                | 0.3   | 0.3   | 2.4                | 2.2    | 2.2    | OOO                | OOO     | OOO    | 2.7    | 2.5    | OOO          | OOO    |
| <b>PDGF-BB</b>                  | 2.1                | 1.1   | 1.8   | 953.6              | 1079.4 | 814.0  | 419.6              | 542.5   | 439.3  | 710.9  | 821.6  | 393.1        | 469.0  |
| <b>IL-15</b>                    | 0.2                | ND    | ND    | 15.2               | 14.4   | 13.6   | 15.9               | 17.1    | 14.6   | 15.0   | 14.1   | 14.1         | 15.4   |
| <b>sCD40L</b>                   | 1.1                | 0.5   | 0.7   | 0.6                | 0.2    | 0.1    | 0.7                | 0.2     | 0.6    | ND     | 0.4    | 1.6          | 0.7    |
| <b>IL-1RA</b>                   | 2.8                | 0.9   | 0.9   | 536.3              | 727.0  | 648.8  | 1292.8             | 1039.9  | 1376.4 | 124.8  | 302.2  | 222.0        | 196.2  |
| <b>IL-1<math>\alpha</math></b>  | 0.5                | ND    | ND    | 104.3              | 133.1  | 83.6   | 262.1              | 418.3   | 322.6  | 49.3   | 57.5   | 153.8        | 162.3  |
| <b>IL-1<math>\beta</math></b>   | ND                 | 0.2   | 0.1   | 4.3                | 7.2    | 3.9    | 9.7                | 11.5    | 13.6   | 3.4    | 3.4    | 8.0          | 6.6    |
| <b>IL-2</b>                     | 0.2                | 0.1   | ND    | 4.4                | 4.6    | 3.9    | 7.0                | 8.2     | 6.0    | 4.2    | 3.9    | 6.5          | 6.4    |
| <b>IL-4</b>                     | 3.2                | 4.7   | 3.5   | 5.0                | 6.6    | 7.8    | 2.9                | 4.7     | OOO    | 7.4    | 4.1    | 6.3          | 6.6    |
| <b>IL-5</b>                     | OOO                | OOO   | OOO   | ND                 | ND     | ND     | ND                 | ND      | ND     | ND     | ND     | ND           | ND     |
| <b>IL-6</b>                     | ND                 | 0.1   | 0.0   | 8.1                | 6.2    | 8.1    | 11.0               | 9.9     | 9.3    | 10.0   | 10.4   | 13.3         | 12.1   |
| <b>IL-8</b>                     | 0.5                | 1.1   | 0.6   | OOO                | OOO    | OOO    | OOO                | OOO     | OOO    | OOO    | OOO    | OOO          | OOO    |
| <b>IP-10</b>                    | 3.6                | 3.1   | ND    | 4148.7             | 4818.3 | 4898.5 | 8485.6             | 13277.4 | 4818.8 | 3812.6 | 4805.5 | 8316.9       | 4202.4 |
| <b>MCP-1</b>                    | 28.0               | 38.9  | 32.5  | 41.8               | 41.0   | 41.9   | 19.1               | 21.6    | 19.5   | 7.8    | 7.4    | 4.7          | 5.4    |
| <b>MIP-1<math>\alpha</math></b> | 3.4                | ND    | 3.9   | 8.6                | 7.1    | 7.3    | 15.3               | 15.1    | 13.0   | 14.4   | 11.1   | 52.3         | 30.3   |
| <b>MIP-1<math>\beta</math></b>  | 4.6                | OOO   | 1.5   | 19.8               | 20.1   | 17.7   | 30.7               | 36.9    | 28.9   | 15.5   | 13.7   | 32.3         | 25.0   |

|                  |      |      |      |       |       |       |       |       |       |       |       |       |        |
|------------------|------|------|------|-------|-------|-------|-------|-------|-------|-------|-------|-------|--------|
| <b>RANTES</b>    | 5.4  | 2.5  | 5.4  | 22.7  | 22.4  | 24.3  | 45.1  | 50.0  | 41.2  | 57.7  | 60.2  | 107.2 | 122.6  |
| <b>TNFa</b>      | 0.1  | 0.1  | 0.2  | 196.9 | 181.3 | 173.6 | 226.3 | 213.8 | 182.7 | 193.9 | 193.3 | 178.2 | 149.8  |
| <b>VEGF-A</b>    | 10.7 | 10.9 | 10.7 | 606.7 | 447.7 | 451.9 | OOR   | OOR   | OOR   | 404.3 | 475.9 | OOR   | 1206.6 |
| <b>IL-18</b>     | 2.5  | 1.8  | 2.1  | 21.9  | 22.3  | 30.8  | 23.8  | 20.0  | 26.4  | 9.2   | 10.3  | 8.0   | 9.0    |
| <b>Eotaxin</b>   | 0.3  | ND   | ND   | 0.2   | 0.6   | ND    | 19.5  | 26.0  | 24.5  | 0.6   | 1.1   | 124.4 | 148.1  |
| <b>MCP-2</b>     | ND   | ND   | 5.7  | 3.6   | 2.4   | ND    | 4.1   | 2.4   | 3.6   | 4.5   | 2.4   | ND    | 5.4    |
| <b>BCA-1</b>     | 0.2  | 0.2  | 0.1  | 8.9   | 11.2  | 11.3  | 0.4   | 0.4   | 0.3   | 6.9   | 6.3   | 0.3   | 0.2    |
| <b>IL-16</b>     | 5.7  | 3.9  | 2.8  | ND    | ND    | ND    | 7.8   | 1.7   | 3.5   | ND    | ND    | ND    | ND     |
| <b>Eotaxin-3</b> | ND   | ND   | ND   | ND    | ND    | ND    | 276.4 | 275.3 | 196.5 | ND    | ND    | 305.2 | 358.5  |
| <b>IL-23</b>     | 18.8 | 25.4 | 12.2 | 25.4  | OOR   | OOR   | 35.4  | 22.1  | 28.7  | OOR   | OOR   | OOR   | 12.2   |
| <b>TRAIL</b>     | 0.3  | 0.3  | 0.4  | 1.4   | 1.5   | 1.6   | 3.0   | 3.0   | 4.0   | 1.0   | 1.1   | 1.6   | 1.8    |
| <b>ENA-78</b>    | 4.3  | 1.4  | 2.5  | 21.1  | 35.8  | 20.5  | 30.3  | 29.5  | 24.1  | 14.6  | 16.1  | 28.7  | 26.6   |

Values are represented as pg/mL. The following proteins were undetectable in all samples and are excluded from the table: IL-12p70, IL-17A, IL-7, IL-9, TNF- $\beta$ , I-309, TARC, 6CKine, SCF, TSLP, IL-33, IL-20, IL-21, and CTACK. Not detected (ND) samples fell below the lower limit of detection, and out of range (OOR) values exceeded the upper limit of detection.

Supplemental Table S2. Blood donor traits

|                 | Race and Ethnicity                     | Age (Years $\pm$ SD) |
|-----------------|----------------------------------------|----------------------|
| All Donors (13) | 13/13 White/Caucasian<br>2/13 Hispanic | 36 $\pm$ 9           |
| Female (9)      | 9/9 White/Caucasian<br>2/9 Hispanic    | 36 $\pm$ 9           |
| Male (4)        | 4/4 White/Caucasian<br>0/4 Hispanic    | 38 $\pm$ 8           |
